# Supplementary material
Source: publisher figshare collection journal article supplement (https://sage.figshare.com/ndownloader/files/14860271)
Supplement: Supplementary file 1 [file 14860271]

*Supplement 1: Exploratory Factor Analysis Using Oblique Rotation of the Emotions During Childbirth Scale (N = 330)*

|                                                       | 1     | 2     | 3    | 4    | 5    |
|-------------------------------------------------------|-------|-------|------|------|------|
| <b>Positive emotions (<math>\alpha = 0.94</math>)</b> |       |       |      |      |      |
| Fantastic                                             | .84   |       |      |      |      |
| Happy                                                 | .83   |       |      |      |      |
| Strong                                                | .81   |       |      |      |      |
| Joyful                                                | .81   |       |      |      |      |
| Proud                                                 | .80   |       |      |      |      |
| Enjoyment                                             | .80   |       |      |      |      |
| Confident                                             | .75   |       |      |      |      |
| Independent                                           | .66   |       |      |      |      |
| Composed                                              | .66   |       |      |      |      |
| Natural                                               | .64   |       |      |      |      |
| Safe                                                  | .57   |       |      |      |      |
| <b>Dissociation (<math>\alpha = 0.80</math>)</b>      |       |       |      |      |      |
| Detached as if in a dream                             |       | .86   |      |      |      |
| That time sped up or slowed down                      |       | .72   |      |      |      |
| It was not really happening                           |       | .70   |      |      |      |
| Confused or disoriented                               |       | .64   |      |      |      |
| Emotionally numb                                      |       | .59   |      |      |      |
| <b>Anger (<math>\alpha = 0.82</math>)</b>             |       |       |      |      |      |
| Angry                                                 |       |       | .81  |      |      |
| Annoyed or irritated                                  |       |       | .80  |      |      |
| That my trust was violated                            |       |       | .68  |      |      |
| <b>Fear (<math>\alpha = 0.87</math>)</b>              |       |       |      |      |      |
| Horrified                                             |       |       |      | .89  |      |
| Panicked                                              |       |       |      | .87  |      |
| Fearful or scared                                     |       |       |      | .79  |      |
| Helpless                                              |       |       |      | .64  |      |
| Distressed                                            |       |       |      | .55  |      |
| <b>Guilt (<math>\alpha = 0.75</math>)</b>             |       |       |      |      |      |
| Like I had failed                                     |       |       |      |      | .86  |
| Guilty                                                |       |       |      |      | .76  |
| Sad                                                   |       |       | .35  |      | .34  |
| Eigenvalues                                           | 10.15 | 2.98  | 1.97 | 1.70 | 1.14 |
| Percent of variance                                   | 37.60 | 11.03 | 7.29 | 6.31 | 4.23 |

*Note:* Only factor loading > .30 are presented.
